# Supplementary material for: Insight into effective denitrification and desulfurization of liquid fuel with deep eutectic solvents: an innovative evaluation criterion to filtrate extractants using the compatibility index
Source: Royal Society of Chemistry journal article supplement (doi:10.1039/c8gc00828k), 2018-01-01
Supplement: c8gc00828k1.pdf [file c8gc00828k1.pdf]

## Supporting Information

### **Insight into effective denitrification and desulfurization of liquid fuel with deep eutectic solvents: an innovative evaluation criterion to filtrate extractants using compatibility index**

Zhiheng Li <sup>a</sup>, Dong Liu <sup>a,\*</sup>, Zhuowu Men <sup>b</sup>, Linhua Song <sup>c</sup>, Yijun Lv <sup>b</sup>, PingPing Wu <sup>a</sup>, Bin Lou <sup>a</sup>, Yadong Zhang <sup>a</sup>, Nan Shi <sup>a</sup> and Qingtai Chen <sup>a</sup>

<sup>a</sup> College of Chemical Engineering, China University of Petroleum, Qingdao 266580, PR China

<sup>b</sup> National Institute of Clean-and-Low-Carbon Energy, Beijing 102209, PR China

<sup>c</sup> College of Science, China University of Petroleum, Qingdao 266580, PR China

#### **Author information**

Corresponding Author

\*Dong Liu, Telephone/Fax: +86-0532-86984629, E-mail: [ldongupc@vip.sina.com](mailto:ldongupc@vip.sina.com)

## 1. Calculation details

### (1) Oxidation of DBT

Standby oil with only DBT (6000 µg/g) was used as the model oil. Equal mass of DESs and model oil were mixed in a round-bottom flask, followed by addition of H<sub>2</sub>O<sub>2</sub> with the mass ratio of m(H<sub>2</sub>O<sub>2</sub>): m(DBT)= 10: 1. The mixture was agitated vigorously at 50 °C for 60min in water bath, and then settled for another 60min at the same temperature. The DESs with sulfides (bottom phase) was taken out and diluted with equal mass of deionized water. The solution was filtered by using ultrafiltration membrane (Φ= 0.45 µm) to obtain the oxidative product of DBT. After drying in a vacuum oven at 60 °C for 24h, the oxidative product was collected in a sample bottle.

### (2) Calculation of electronic static potential (ESP) difference

Gaussian 09 revision D.01 was applied to optimize the molecular geometries of HBDs and heterocycles with DFT-D3 method at M062X/6-311+G\*\* level, and then followed by investigation of ESP mapped on an isosurface of electronic density of 0.001 a.u. as shown in Fig. S4. Considering the acidity or alkalinity, the electronic static potential difference of HBDs and heterocycles was calculated by:

$$|\Delta E_i| = |E_i^H - E_\infty| \quad (S1)$$

$$|\Delta E_j| = |E_j^{HA} - E_\infty| \quad (S2)$$

where  $E_i^H$  donates the ESP upon hydroxyl hydrogen atom in HBDs,  $E_i^{S/N}$  is the ESP of heteroatom (sulfur or nitrogen) in heterocycles, and  $E_\infty$  represents the ESP at infinity. Theoretically, the value of  $E_\infty$  should be zero.

For heterocycles without acidity or alkalinity, the electronic static potential difference of HBDs and heterocycles was obtained by:

$$|\Delta E_i|' = |E_i^A - E_i^B| \quad (\text{S3})$$

$$|\Delta E_j|' = |E_j^A - E_j^B| \quad (\text{S4})$$

where  $E_i^A$  (or  $E_j^A$ ) and  $E_i^B$  (or  $E_j^B$ ) are the ESP of A and B atoms upon HBDs (or heterocycles), respectively.

### (3) Calculation of intermolecular interaction energy

The di-molecular structures of HBDs and heterocycles were optimized with DFT-D3 method at M062X/6-311+G\*\* level to obtain the total energy. By the way, the individual energy of optimized HBDs and heterocycles was also calculated by Gaussian. The interaction energy between HBDs and heterocycles was therefore determined from:

$$\text{Interaction energy} = E(Hh) - E(H) - E(h) \quad (\text{S5})$$

where  $E(Hh)$  means the total energy of the di-molecules,  $E(H)$  and  $E(h)$  represent the individual energy of HBDs and heterocycles, respectively.

### (4) Calculation of proton dissociation enthalpy ( $\Delta H$ )

The geometries of the HBDs molecules and their anions were optimized at first, and then followed by vibrational frequency calculation with DFT-D3 method at B3LYP/6-31+G (d, p) level. The  $\Delta H$  values of HBDs could be obtained from:

$$\Delta H = E(M^-) - E(M) + E(H^+) \quad (\text{S6})$$

where  $E(M^-)$  was the enthalpy of the anion,  $E(M)$  represented the enthalpy of the molecule, and  $E(H^+)$  was the enthalpy of  $H^+$  (6.19 kJ/mol) [1].

### (5) Regeneration of DESs

The recycled DESs was diluted with equal mass of deionized water, followed by a filtration for the solution using ultrafiltration membrane ( $\Phi = 0.45 \mu\text{m}$ ). The rotary evaporation would be conducted to eliminate most of water in the solution. Finally, the sticky liquid was thoroughly dried in a vacuum oven at  $60^\circ\text{C}$  for 24h to obtain regenerated DESs.

## 2. Tables

Table S1 Calculation results of  $|\Delta E_i|$  and  $|\Delta E_j|$  for various HBDs and heterocycles

| Classification | Components                | $ \Delta E_i $ (kJ·mol <sup>-1</sup> ) | $ \Delta E_j $ (kJ·mol <sup>-1</sup> ) |
|----------------|---------------------------|----------------------------------------|----------------------------------------|
| HBDs           | p-Methylphenylacetic acid | 197.9                                  |                                        |
|                | Mandelic acid             | 201.9                                  |                                        |
|                | p-Toluenesulfonic acid    | 232.2                                  |                                        |
|                | 1, 3-Propylene glycol     | 179.4                                  |                                        |
|                | Malonic acid              | 217.8                                  |                                        |
|                | Urea                      | 150.5                                  |                                        |
|                | L-(+)-Tartaric acid       | 237.8                                  |                                        |
| Heterocycles   | Quinoline                 |                                        | 147.7                                  |
|                | Carbazole                 |                                        | 33.73                                  |
|                | DBT                       |                                        | 54.25                                  |
|                | DBTO <sub>2</sub>         |                                        | 148.8                                  |

Table S2 Calculation results of  $|\Delta E_i|'$  and  $|\Delta E_j|'$  for various HBDs and heterocycles

| Classification | Components                | $ \Delta E_i '$ (kJ·mol <sup>-1</sup> ) | $ \Delta E_j '$ (kJ·mol <sup>-1</sup> ) |
|----------------|---------------------------|-----------------------------------------|-----------------------------------------|
| HBDs           | p-Methylphenylacetic acid | 15.37                                   |                                         |
|                | Mandelic acid             | 18.96                                   |                                         |
|                | p-Toluenesulfonic acid    | 25.1                                    |                                         |
|                | 1, 3-Propylene glycol     | 58.76                                   |                                         |
|                | Malonic acid              | 79.84                                   |                                         |
|                | Urea                      | 83.28                                   |                                         |
|                | L-(+)-Tartaric acid       | 104.9                                   |                                         |
| Heterocycles   | Carbazole                 |                                         | 19.82                                   |
|                | DBT                       |                                         | 3.544                                   |
|                | DBTO <sub>2</sub>         |                                         | 24.78                                   |

Table S3 Desulfurization efficiency of real diesel with D2 and D3

| Extractant | Oxidant                       | Classes (µg/g) with <b>removal efficiencies (wt.%)</b> |              |              |              | Total (µg/g) |
|------------|-------------------------------|--------------------------------------------------------|--------------|--------------|--------------|--------------|
|            |                               | Thiophenes <sup>a</sup>                                | Thiols       | Thioethers   | Others       |              |
| None       | None                          | 2367.3 (-)                                             | 160.3 (-)    | 358.7 (-)    | 764.3 (-)    | 3650 (-)     |
| D2         | None                          | 2206.4 (6.8)                                           | 97.32 (39.3) | 336.4 (6.2)  | 627.2 (17.9) | 3267 (10.5)  |
| D3         | None                          | 2127.9 (10.1)                                          | 95.20 (40.6) | 333.8 (6.9)  | 611.5 (20.0) | 3168 (13.2)  |
| D2         | H <sub>2</sub> O <sub>2</sub> | 933.8 (60.6)                                           | 84.29 (47.1) | 120.1 (66.5) | 198.4 (74.0) | 1337 (63.4)  |
| D3         | H <sub>2</sub> O <sub>2</sub> | 799.6 (62.2)                                           | 73.66 (54.0) | 124.8 (65.2) | 181.0 (76.3) | 1179 (67.7)  |

<sup>a</sup> contains thiophenes, benzothiophene, dibenzothiophene and their derivatives.

Table S4 Denitrification efficiency of real diesel with D2 and D3

| Extractant | Oxidant                       | Classes (µg/g) with <b>removal efficiencies (wt.%)</b> |                       |                        |              | Total (µg/g) |
|------------|-------------------------------|--------------------------------------------------------|-----------------------|------------------------|--------------|--------------|
|            |                               | Amines <sup>a</sup>                                    | Pyrroles <sup>b</sup> | Pyridines <sup>c</sup> | Others       |              |
| None       | None                          | 77.27 (-)                                              | 115.88 (-)            | 58.33 (-)              | 174.8 (-)    | 426.3 (-)    |
| D2         | None                          | 30.60 (60.4)                                           | 47.60 (58.9)          | 16.04 (72.5)           | 96.30 (44.9) | 190.5 (55.3) |
| D3         | None                          | 28.55 (63.1)                                           | 47.79 (58.7)          | 14.98 (74.3)           | 91.13 (47.9) | 182.4 (57.2) |
| D2         | H <sub>2</sub> O <sub>2</sub> | 24.67 (68.1)                                           | 32.17 (72.2)          | 14.97 (74.3)           | 87.18 (50.1) | 159.0 (62.7) |
| D3         | H <sub>2</sub> O <sub>2</sub> | 26.81 (65.3)                                           | 28.13 (75.7)          | 13.53 (76.8)           | 86.17 (50.7) | 154.6 (63.7) |

<sup>a</sup> contains amine, amide and their derivatives; <sup>b</sup> contains pyrrole, indole, carbazole and their derivatives; and <sup>c</sup> contains pyridine, quinoline and their derivatives.

### 3. Figures

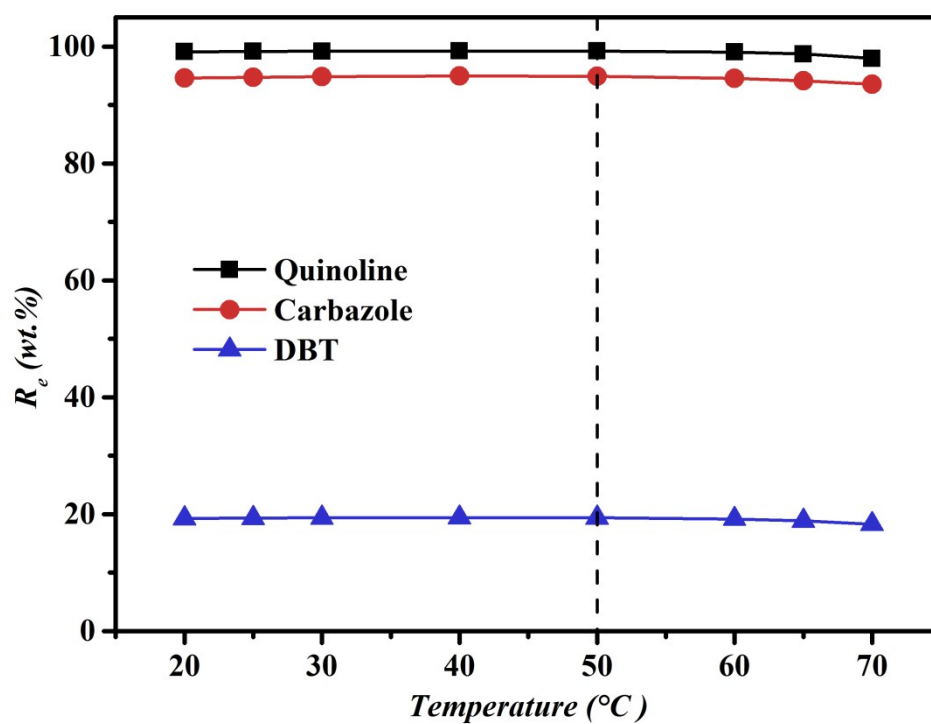

Fig. S1 Effect of extraction temperature on the removal efficiency (extraction time of 60min, m(DESs):m(model oil) ratio of 1:1)

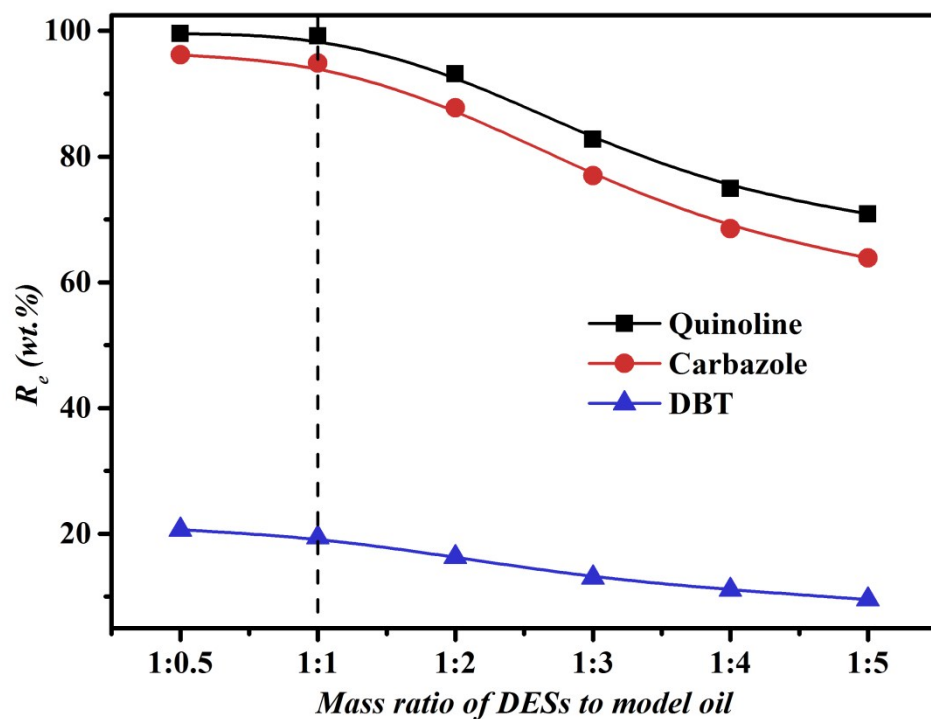

Fig. S2 Effect of DESs/model oil mass ratio on the removal efficiency (extraction temperature of 50  $^{\circ}\text{C}$ , extraction time of 60min)



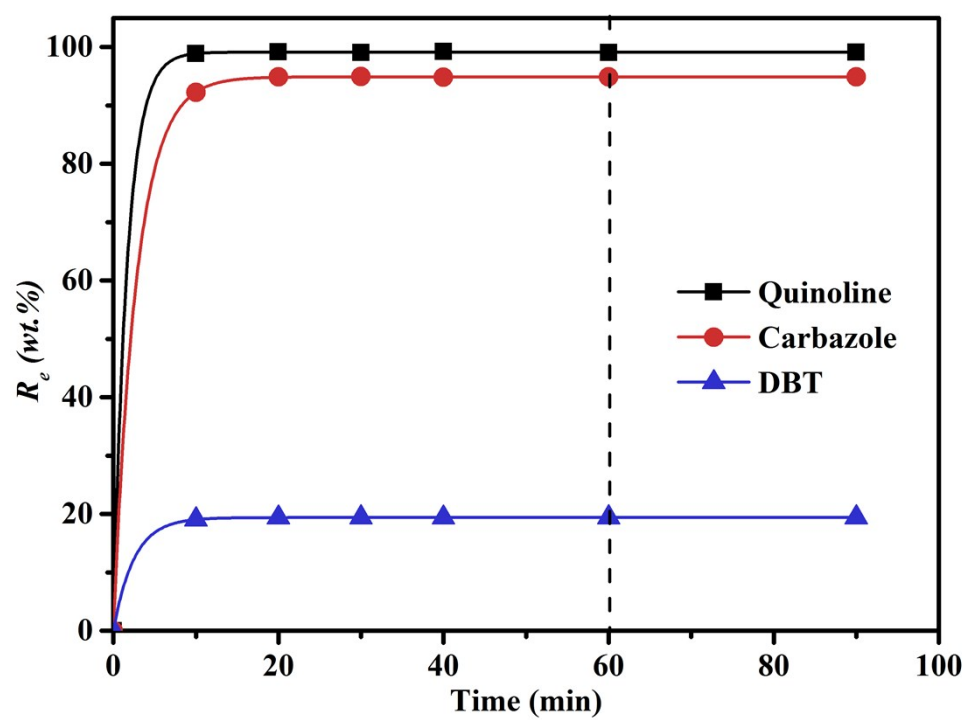

Fig. S3 Effect of extraction time on the removal efficiency (extraction temperature of 50 °C, m(DESs):m(model oil) ratio of 1:1)

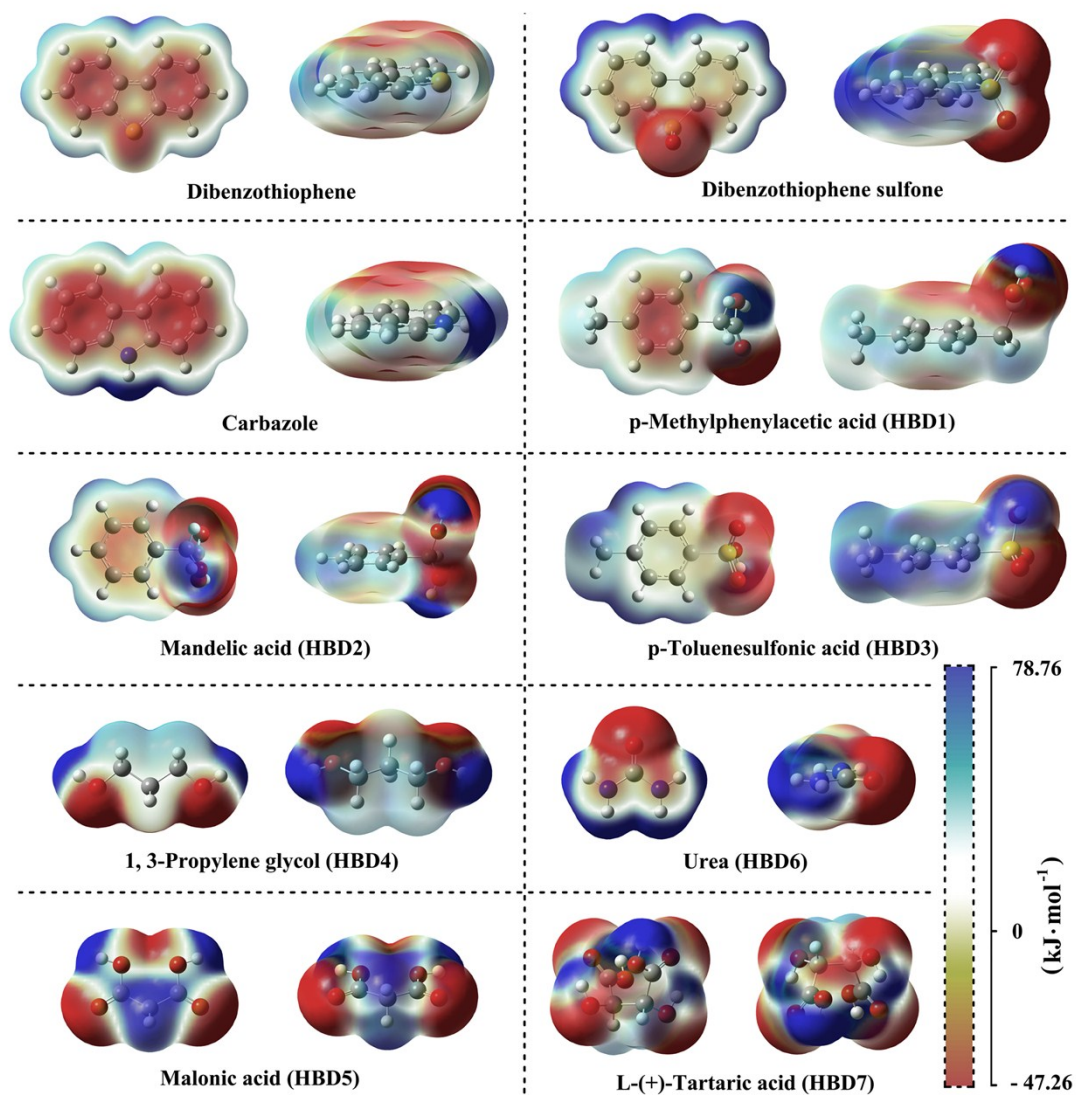

Fig. S4 Electronic static potential (ESP) of various HBDs and targeted heterocycles molecules

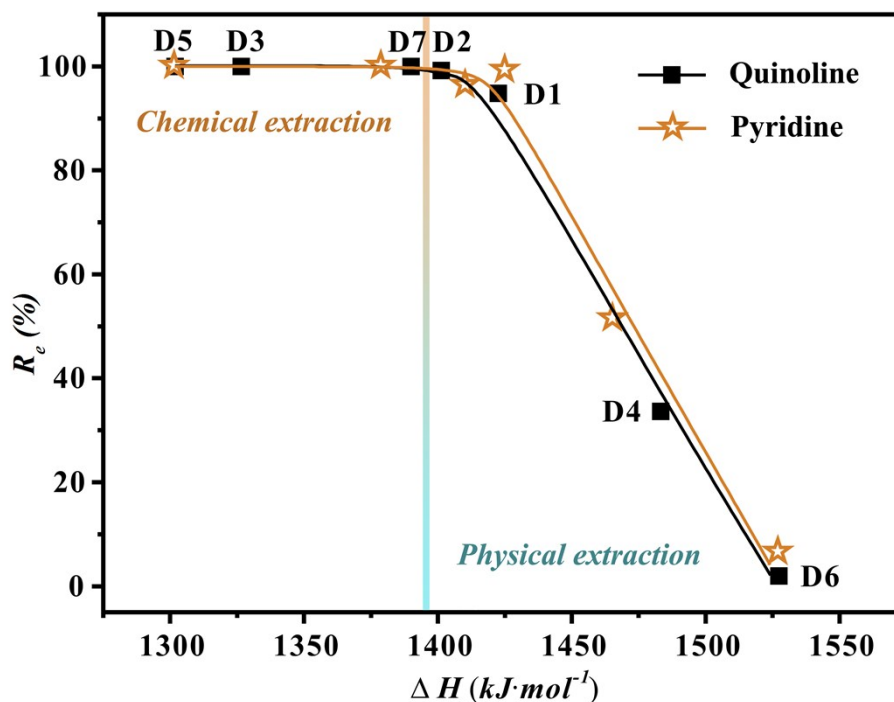

Fig. S5 Plots of  $R_e$  values for quinoline and pyridine as a function of proton dissociation enthalpy ( $\Delta H$ ) for HBDs. The calculation was conducted at B3LYP/6-31+G\*\* level with DFT-D3 empirical dispersion corrections using Gaussian 09 D.01 software. (Quinoline: this work, pyridine: from Ali et al. [2])

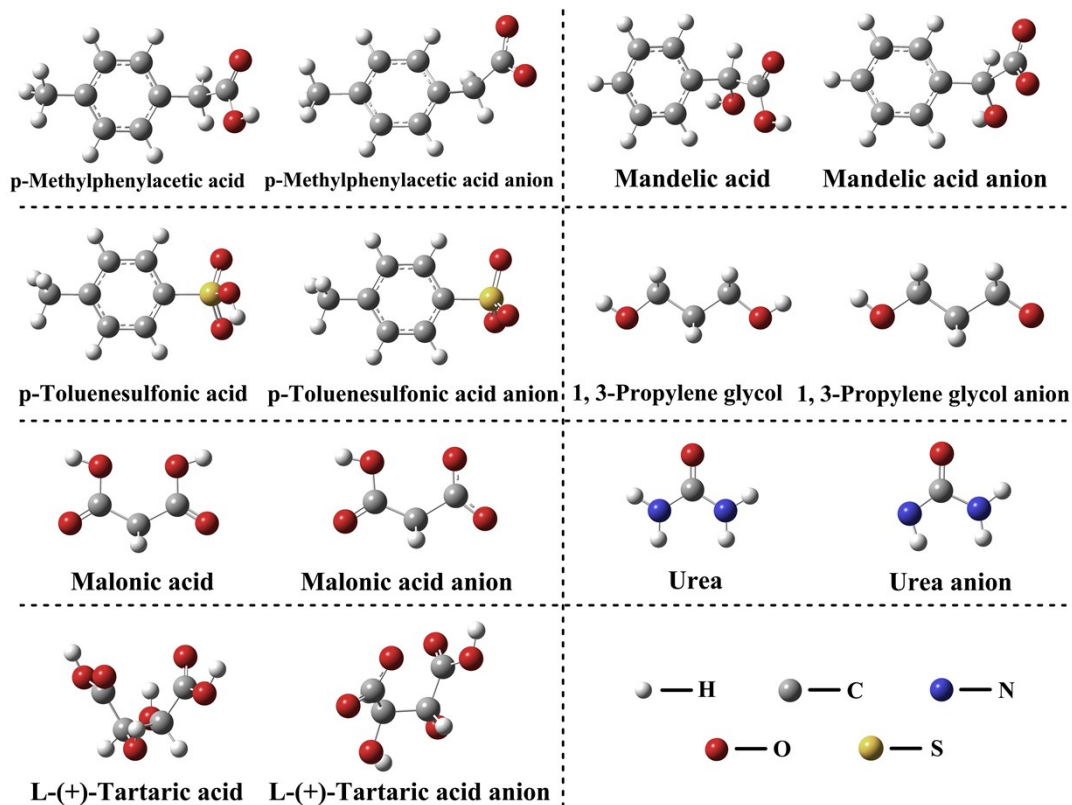

Fig. S6 Optimized geometries of various HBDs molecules and anions using Gaussian 09 software

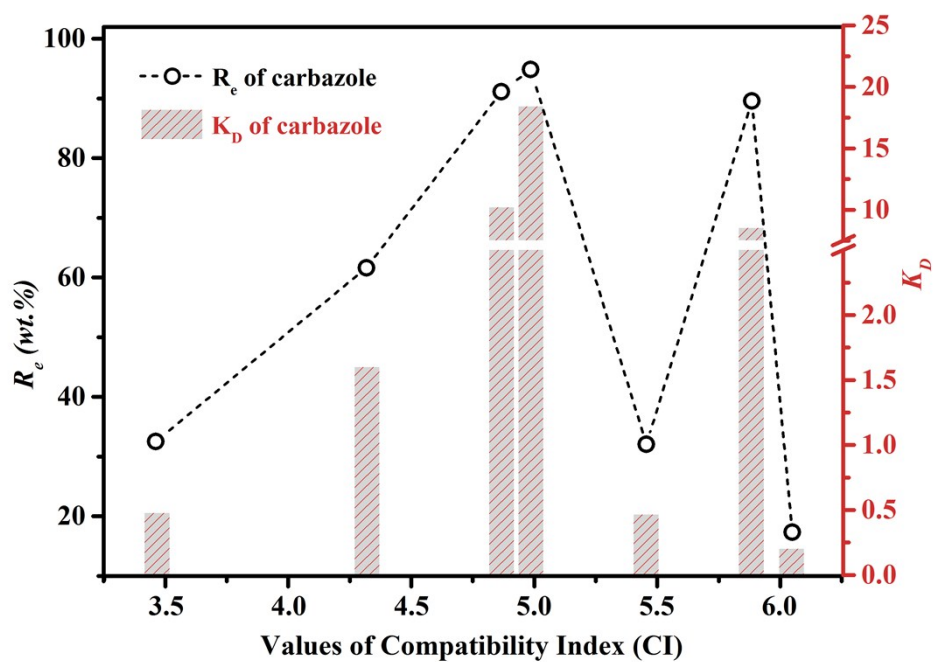

Fig. S7 Influence of parameter CI on the  $R_e$  and  $K_D$  values for removing carbazole

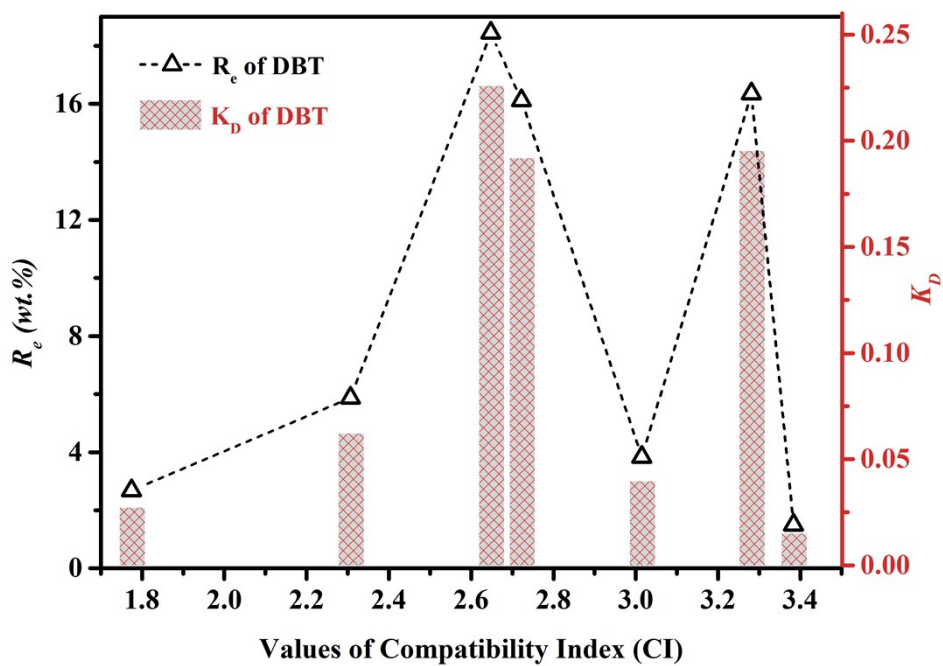

Fig. S8 Influence of parameter CI on the  $R_e$  and  $K_D$  values for removing DBT

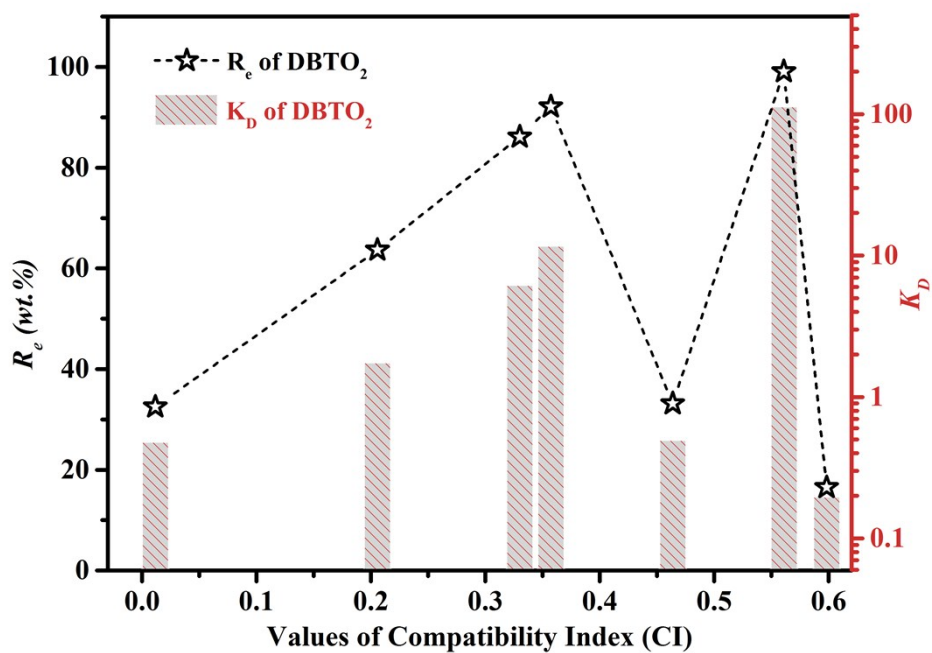

Fig. S9 Influence of parameter CI on the  $R_e$  and  $K_D$  values for removing DBTO<sub>2</sub>

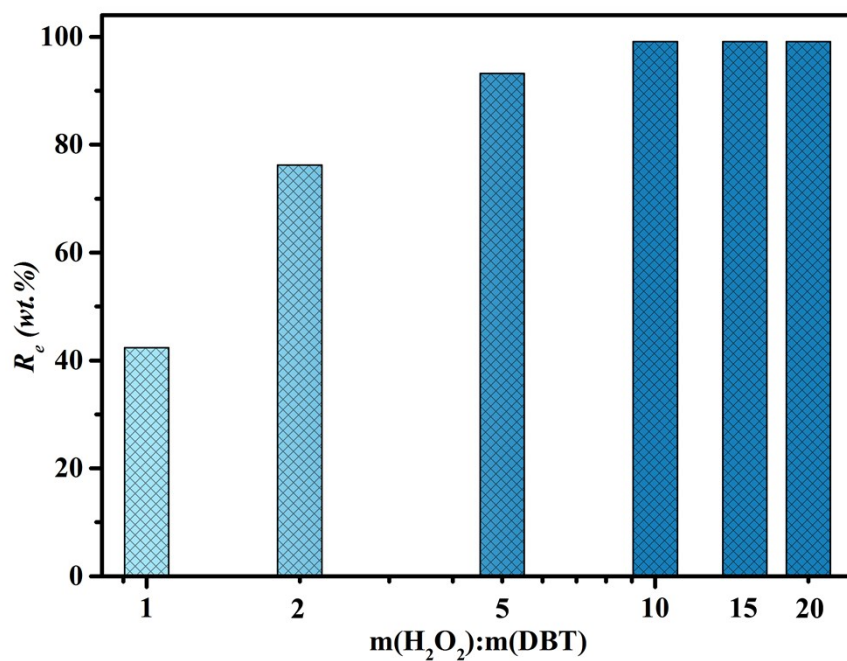

Fig. S10 Influence of  $m(\text{H}_2\text{O}_2):m(\text{DBT})$  ratio on the removal efficiency of sulfides (extraction temperature of 50 °C, extraction time of 60 min)



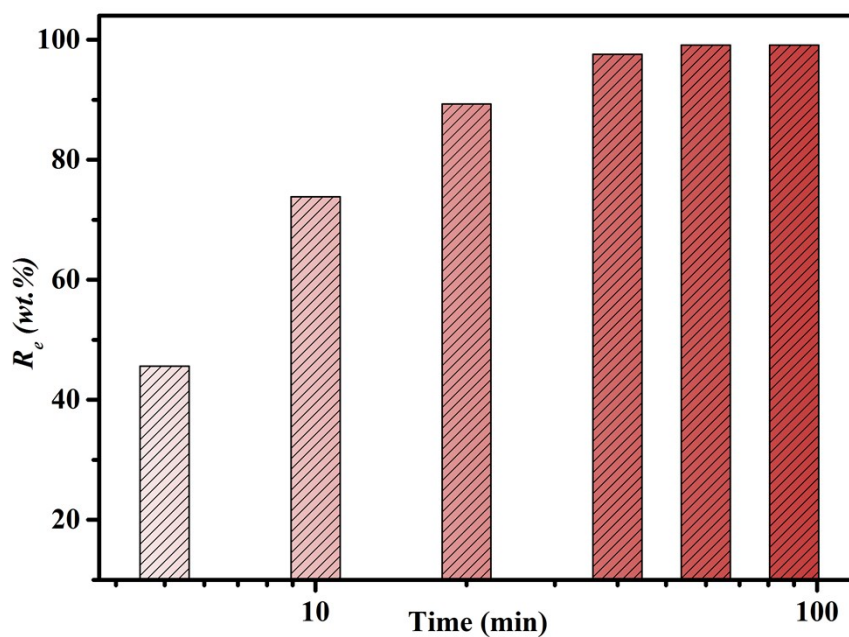

Fig. S11 Influence of reaction time on the removal efficiency of sulfides (extraction temperature of 50 °C, m(H<sub>2</sub>O<sub>2</sub>):m(DBT) ratio of 10:1)

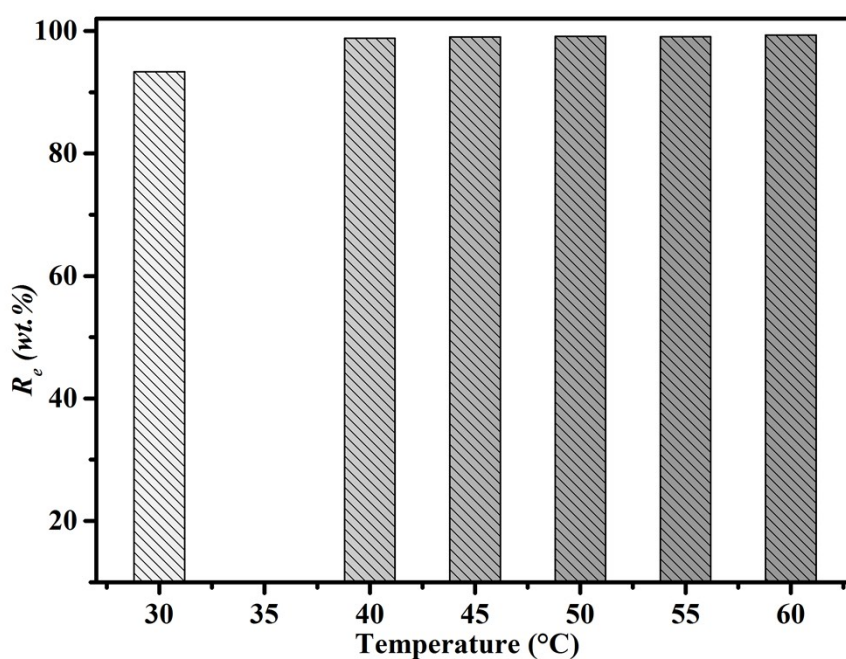

Fig. S12 Influence of reaction temperature on the removal efficiency of sulfides (extraction time of 60 min, m(H<sub>2</sub>O<sub>2</sub>):m(DBT) ratio of 10:1)

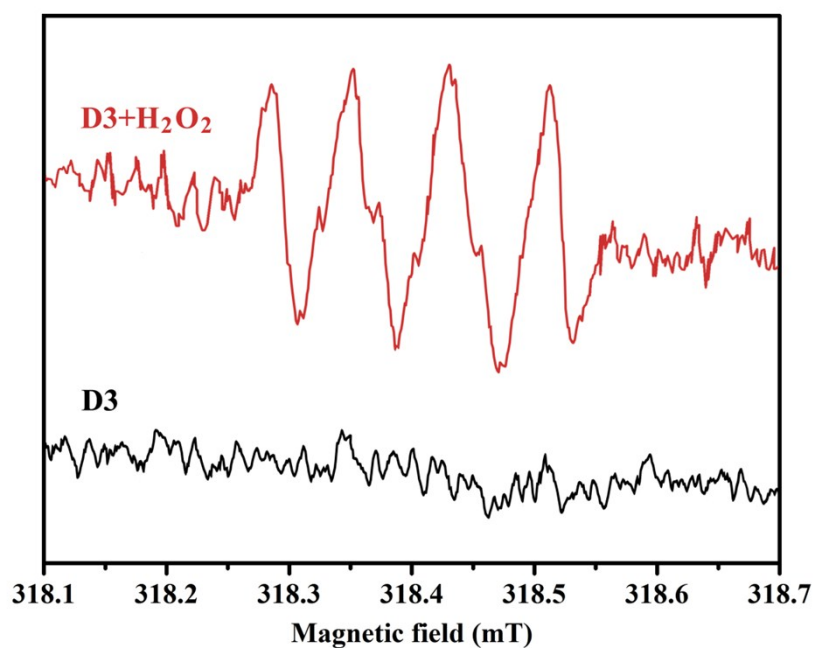

Fig. S13 Electron spin resonance (ESR) spectra of  $\text{DMPO-O}_2^{\bullet-}$  in D3 systems with or without  $\text{H}_2\text{O}_2$ . The characteristic peaks suggest the generation of  $\text{O}_2^{\bullet-}$  radical in D3 extraction system, which is responsible for the oxidation of DBT into  $\text{DBTO}_2$ .

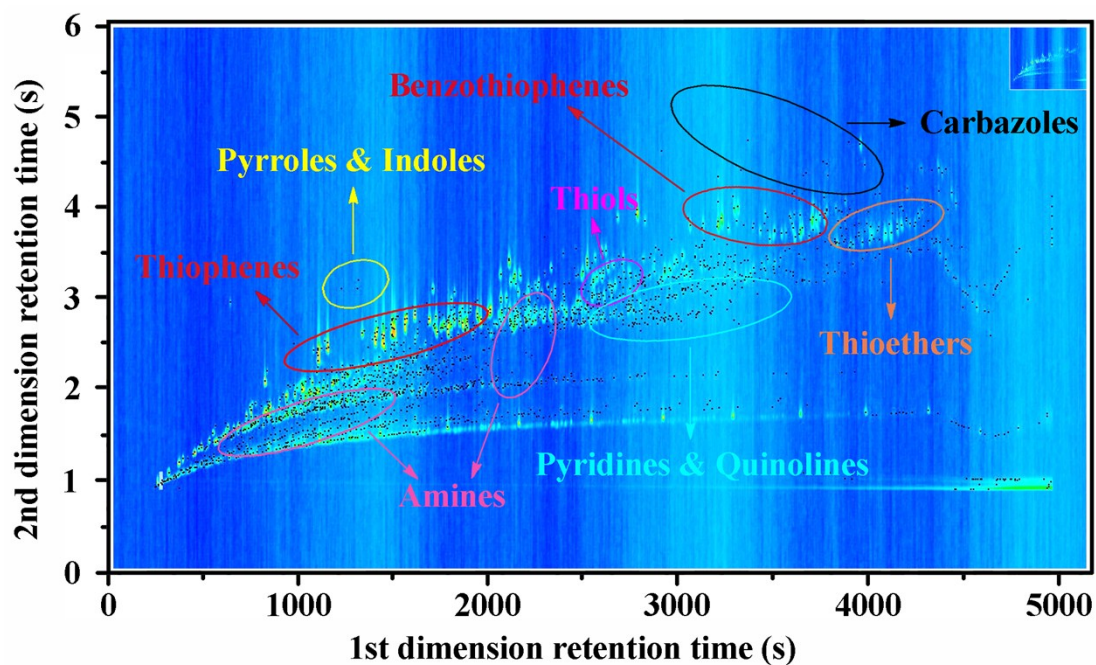

Fig. S13 Two-dimensional contour plot of raw catalytic cracking diesel

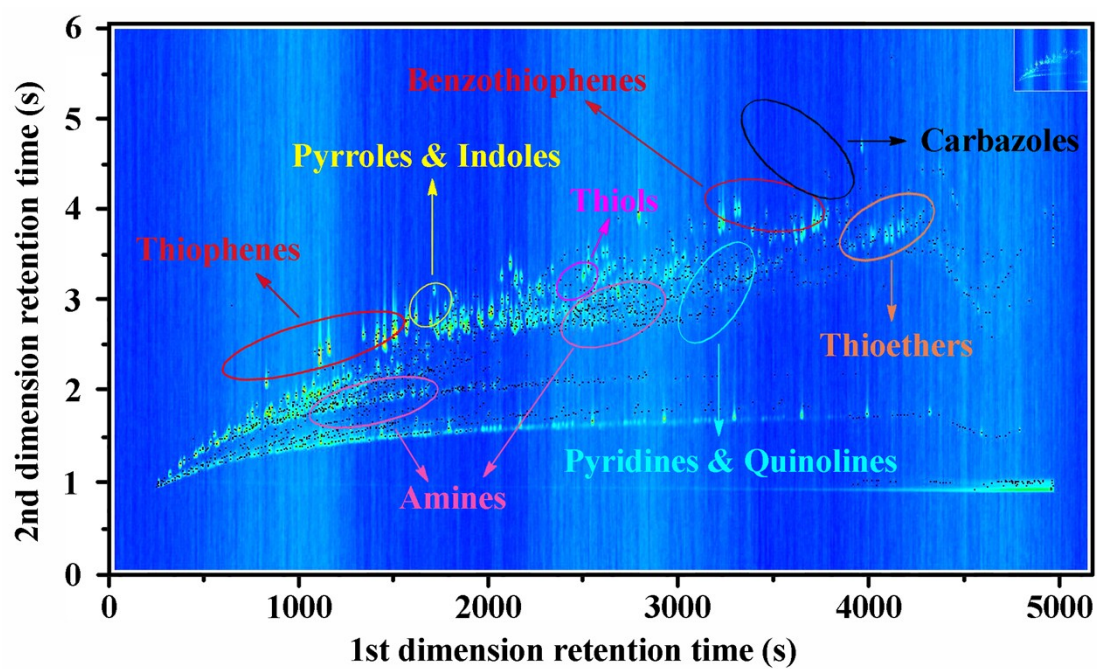

Fig. S14 Two-dimensional contour plot of catalytic cracking diesel after oxide-assisted extraction in D3

Reference:

- [1] R. Vessecchi and S. E. Galembeck, *J. Phys. Chem. A*, 2008, **112**, 4060.
- [2] M. C. Ali, Q. Yang, A. A. Fine, W. Jin, Z. Zhang, H. Xing and Q. Ren, *Green Chem.*, 2016, **18**, 157
